# Supplementary material
Source: PubMed Central journal article supplement (PMC6366944)
Supplement: NIHMS1504935-supplement-8.pdf [file NIHMS1504935-supplement-8.pdf]

**TABLE S3**, related to Figures 1-7.

Oligonucleotides used during the course of this study.

| <b>Oligonucleotides</b>                                       |                          |                      |
|---------------------------------------------------------------|--------------------------|----------------------|
| RBBP6 forward primer:<br>CATACGGCGGCCGCTTCCTGTGTGCATTATAAATTT | This paper               | N/A                  |
| RBBP6 reverse primer:<br>AGATCCCTCGAGTTACACAGTGACAGATTTTAC    | This paper               | N/A                  |
| SMARTpool: Accell RBBP6 siRNA                                 | Dharmacon                | Cat#E-006551-00-0005 |
| ON-TARGETplus Non-targeting siRNA #1                          | Thermo Fisher Scientific | Cat#D0018100105      |
| RBBP6 siRNA _1                                                | Qiagen                   | Cat#SI03118815       |
| RBBP6 siRNA _2                                                | Qiagen                   | Cat#SI03031322       |
| Control siRNA                                                 | Qiagen                   | Cat#SI03650318       |
| NPC1 siRNA                                                    | Qiagen                   | Cat#SI00005908       |
| NP mRNA forward primer:<br>CAGTGCGCCACTCACGGACA               | Shabman et al.,<br>2013  | N/A                  |
| NP mRNA reverse primer:<br>TGGTGTCAGCATGCGAGGGC               | Shabman et al.,<br>2013  | N/A                  |
| VP30 mRNA forward primer:<br>GCACCCAAGGACTCGCGCTT             | Shabman et al.,<br>2013  | N/A                  |
| VP30 mRNA reverse primer:<br>TCGCCAGTGTTCTGCCGTC              | Shabman et al.,<br>2013  | N/A                  |
| Actin mRNA forward primer:<br>ACTGGAACGGTGAAGGTGAC            | Shabman et al.,<br>2013  | N/A                  |

|                                                      |                         |     |
|------------------------------------------------------|-------------------------|-----|
| Actin mRNA reverse primer:<br>GTGGA CT TGGGAGAGGACTG | Shabman et al.,<br>2013 | N/A |
| RBBP6 mRNA forward primer:<br>AGATTCAA AAGGAGCGTAGGC | This paper              | N/A |
| RBBP6 mRNA reverse primer:<br>TCGAGAATAAGAGCGTGAACG  | This paper              | N/A |
