# Supplementary material
Source: PubMed Central journal article supplement (PMC6366944)

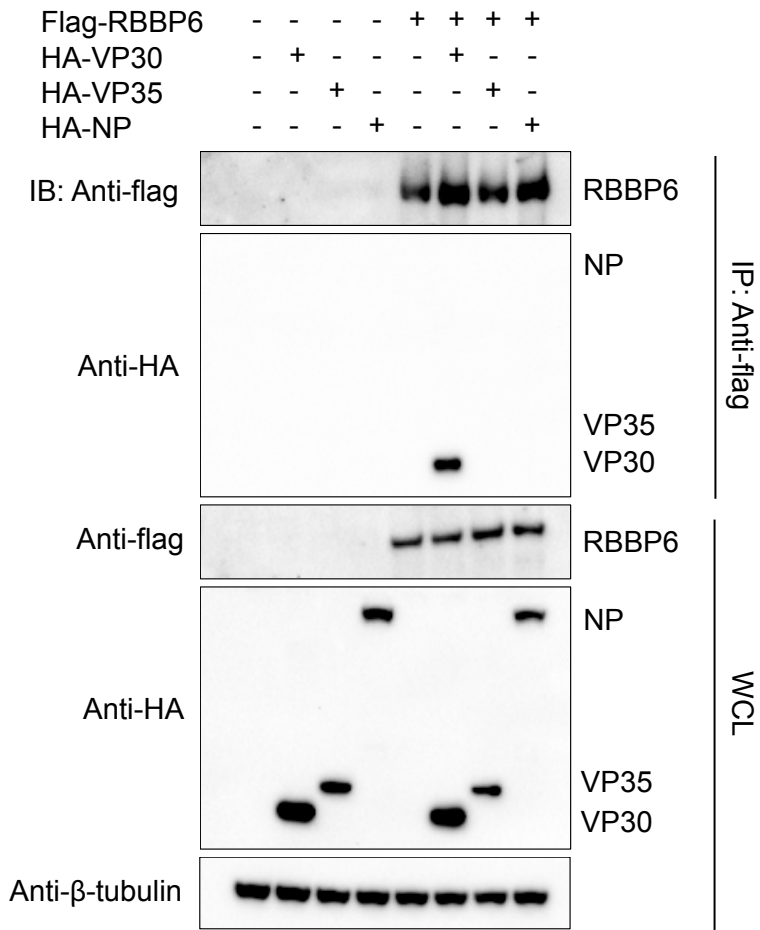

FIGURE S1. (Related to fig. 3)

Supplement: NIHMS1504935-supplement-1.pdf [file NIHMS1504935-supplement-1.pdf]

**A**

**RBBP6**

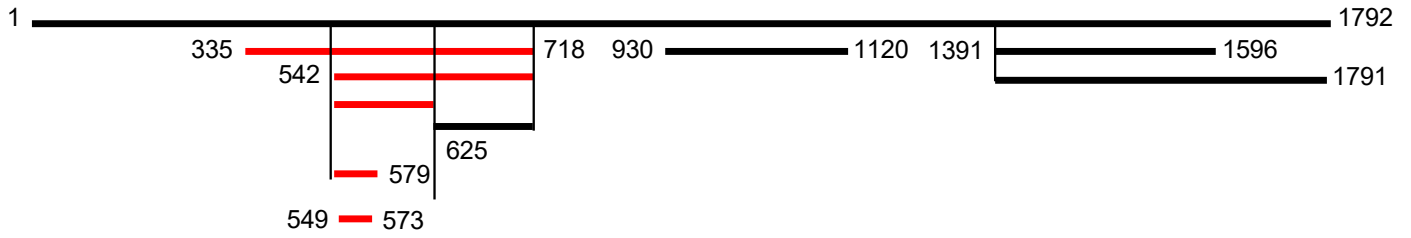

**eVP30**

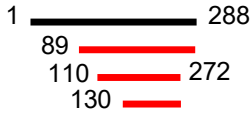

**B**

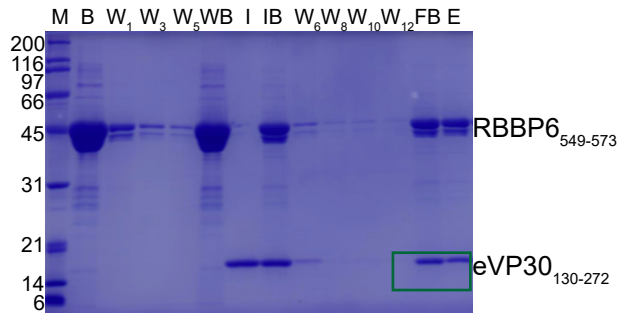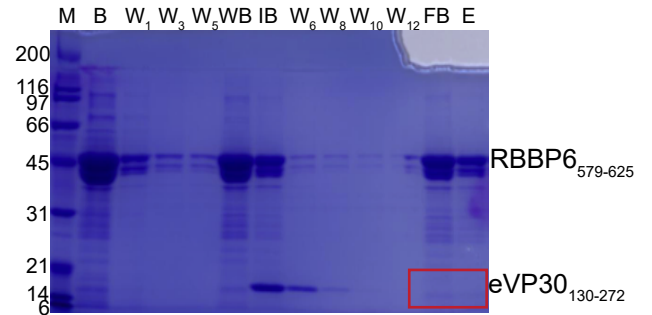

**C**

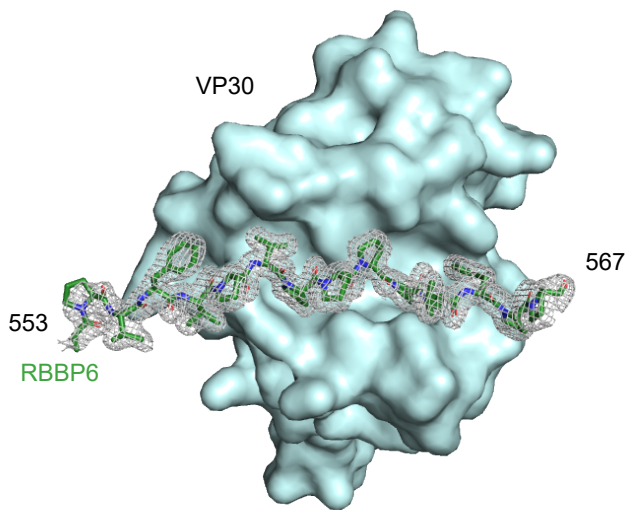

**D**

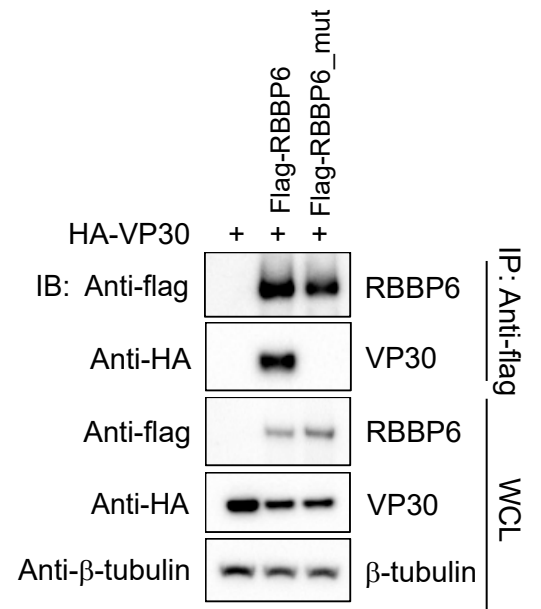

FIGURE S2. (Related to fig. 4)

Supplement: NIHMS1504935-supplement-2.pdf [file NIHMS1504935-supplement-2.pdf]

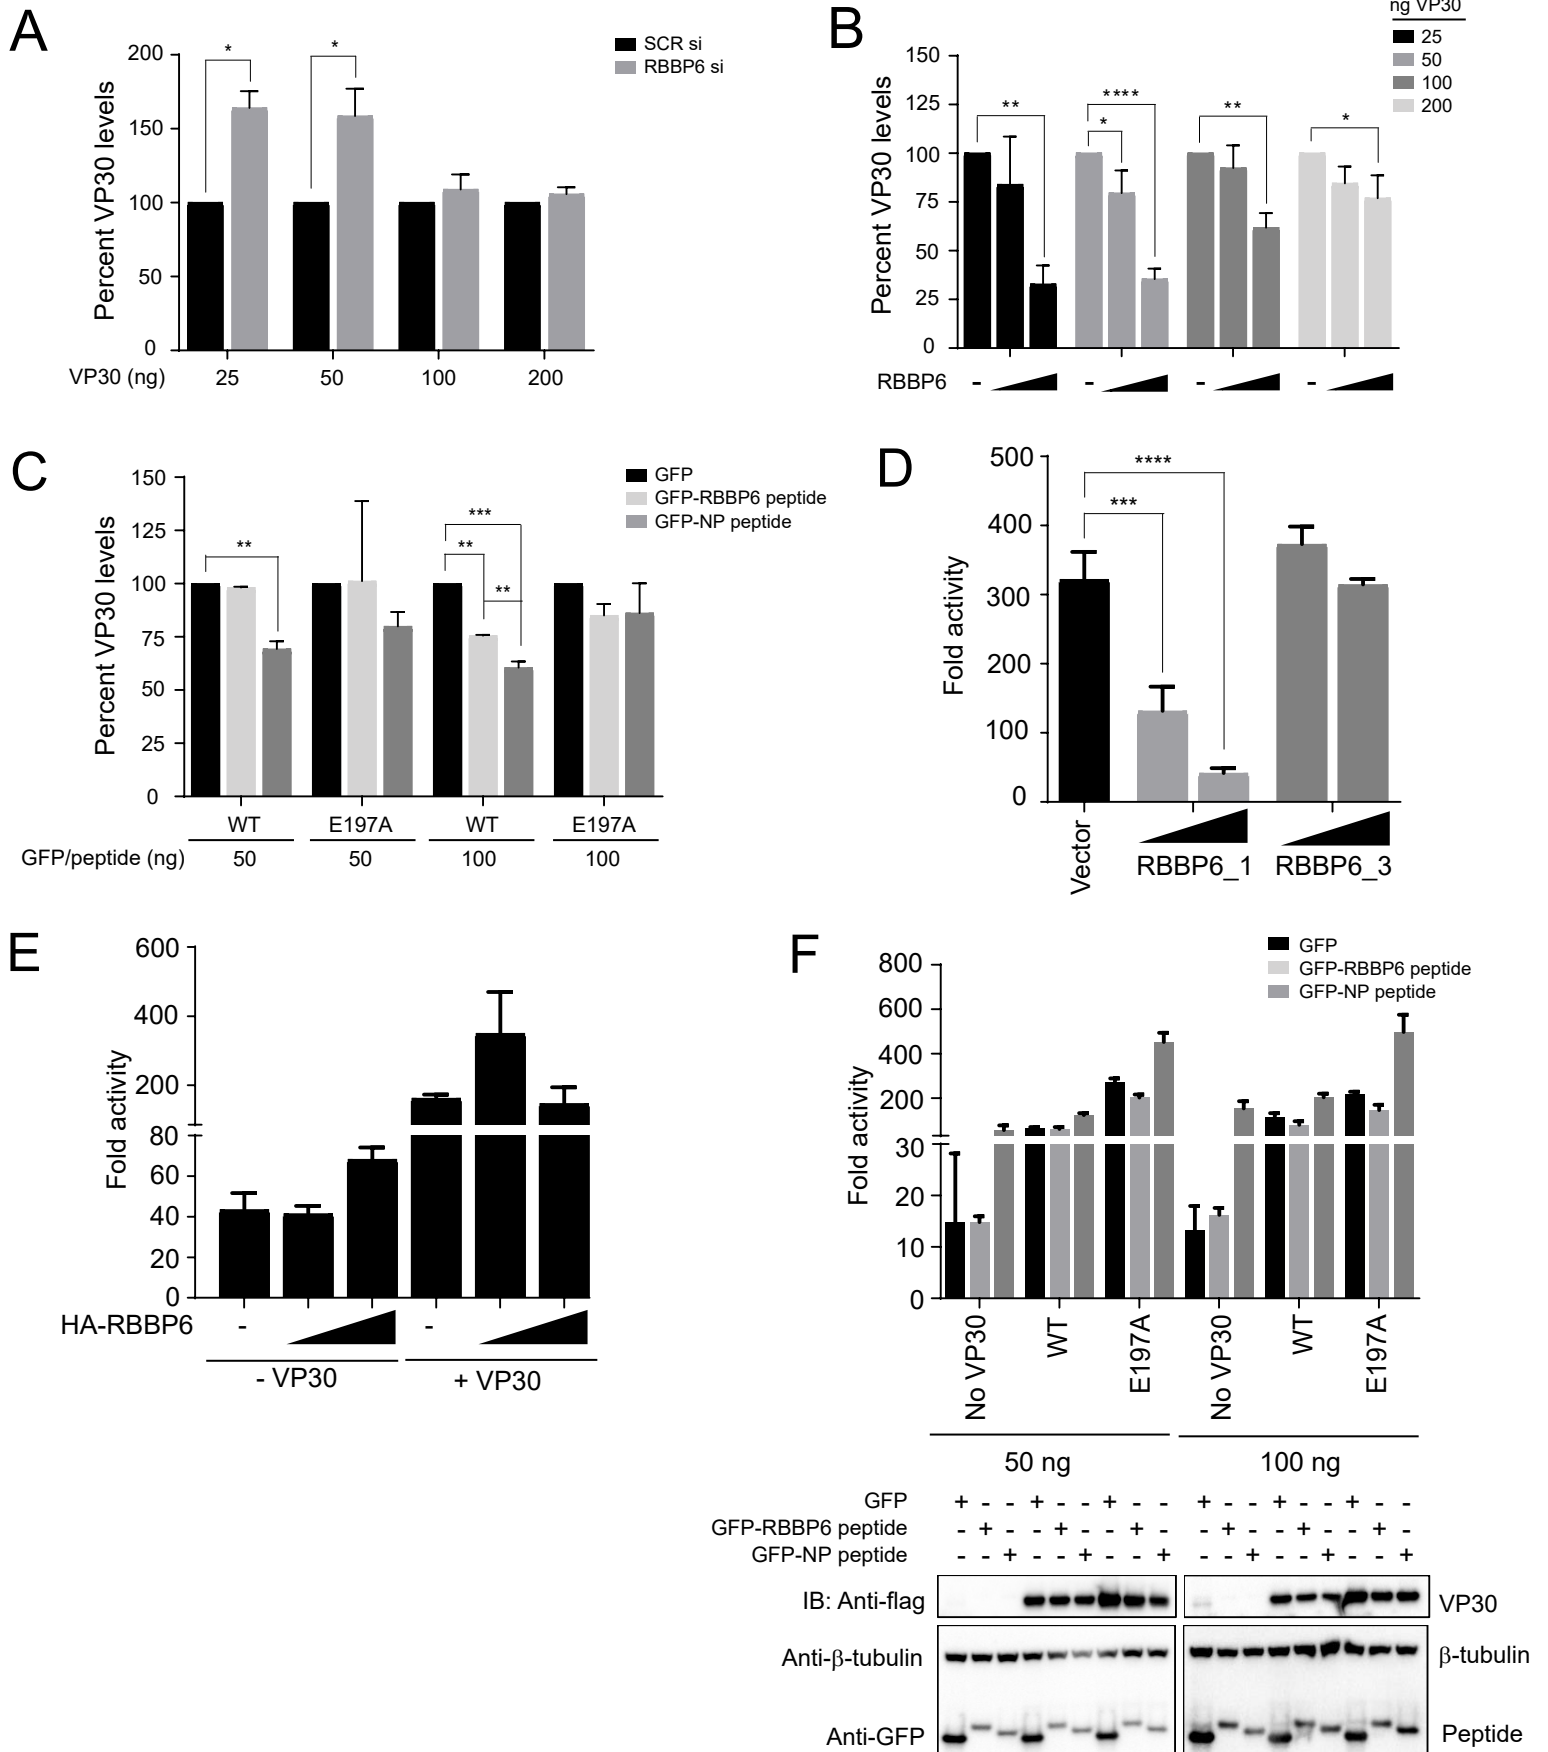

FIGURE S3. (Related to fig. 6)

Supplement: NIHMS1504935-supplement-3.pdf [file NIHMS1504935-supplement-3.pdf]
